# Supplementary material for: Bias stress stable aqueous solution derived Y-doped ZnO thin film transistors
Source: Royal Society of Chemistry journal article supplement (doi:10.1039/c1jm11586c), 2011-01-01
Supplement: c1jm11586c.pdf [file c1jm11586c.pdf]

## Electronic Supplementary Information

### Bias Stress Stable Aqueous Solution Derived Y-Doped ZnO

#### Thin Film Transistors

Taehwan Jun,<sup>a</sup> Keunkyu Song,<sup>a</sup> Yangho Jung,<sup>a</sup> Sunho Jeong,<sup>b</sup> and Jooho Moon<sup>\*a</sup>

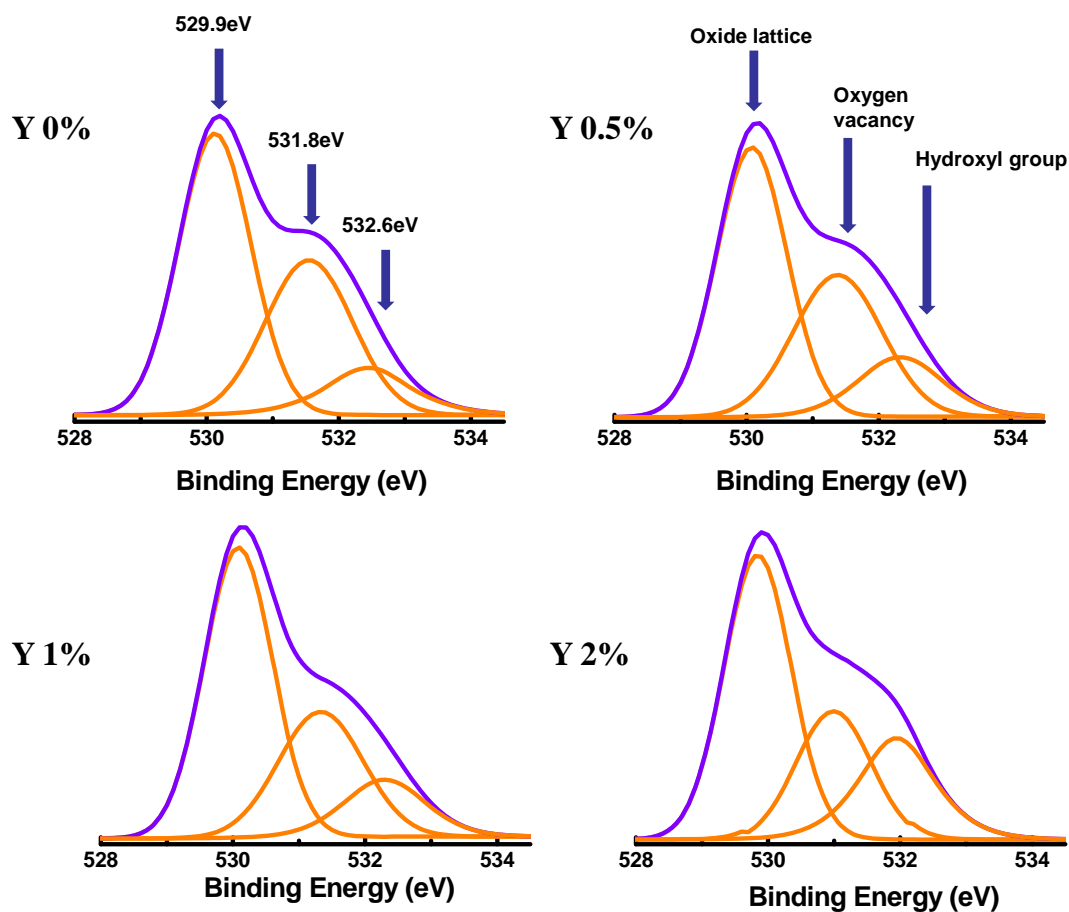

**Fig. S1.** XPS spectra of the O1s core level line for the solution processed YZO films as a function of Y content.

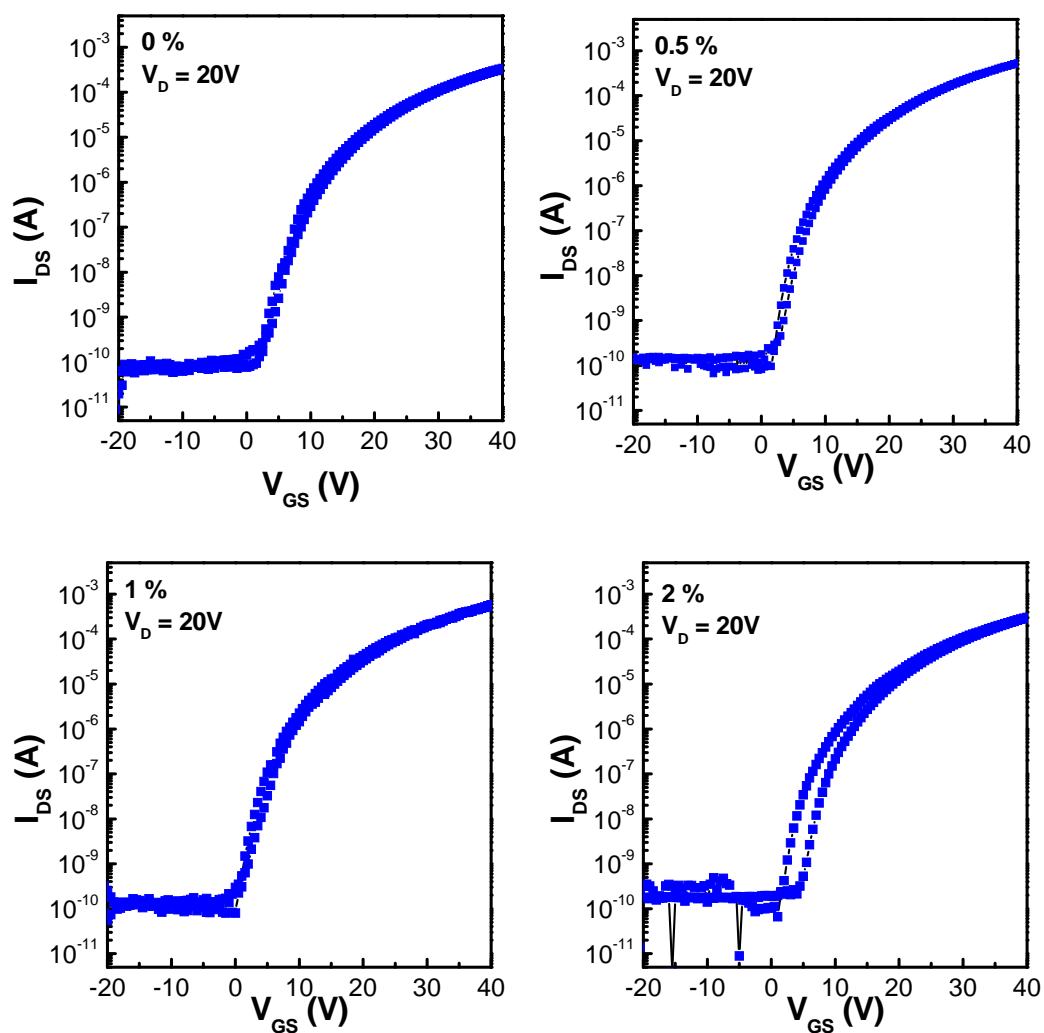

**Fig. S2.** Transfer characteristics of YZO TFTs as a function of Y doping concentration.

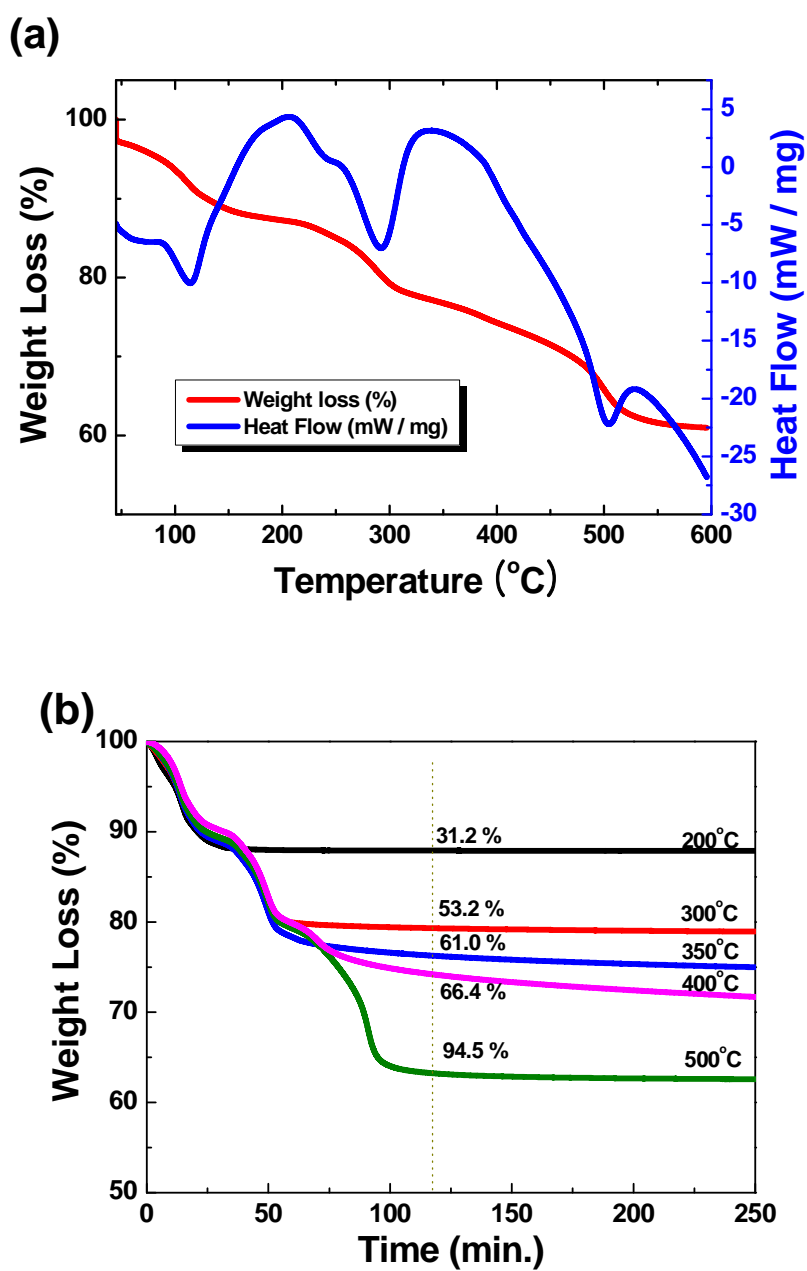

**Fig. S3.** (a) Thermogravimetric analysis (TGA) and differential scanning calorimetry (DSC) and (b) thermal behavior as a function of temperature ranging from 200 °C to 500 °C of the as-prepared  $\text{Y}(\text{OH})_3$  powder. The numbers in (b) indicate the dehydration percentage for  $\text{Y}(\text{OH})_3$ . These values were calculated using the ratio of weight loss after 2 h at a specific temperature in (b) to the weight loss at 600 °C (it is considered that a complete dehydration of  $\text{Y}(\text{OH})_3$  occurs at 600 °C as shown in (a)).

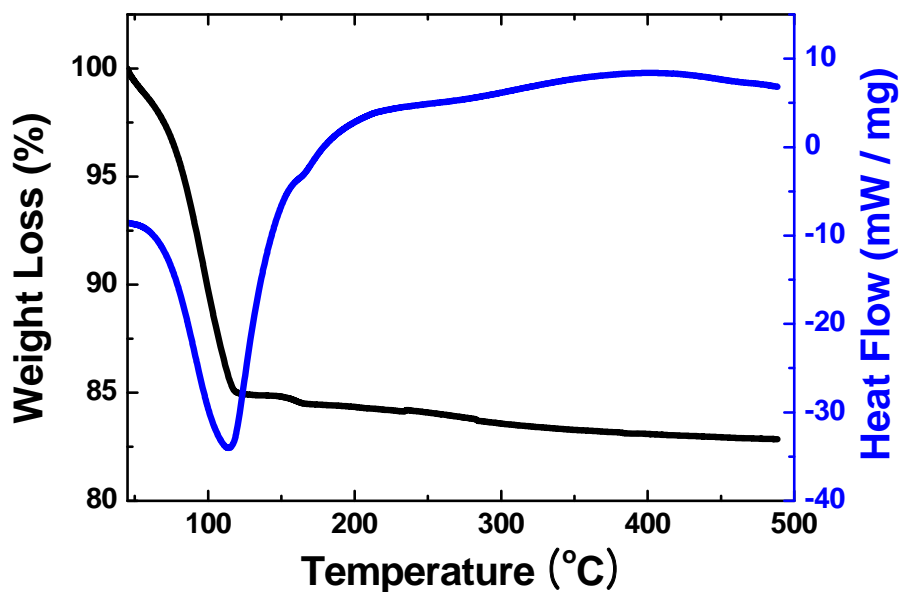

**Fig. S4.** Thermogravimetric analysis (TGA) and differential scanning calorimetry (DSC) of  $\text{Zn(OH)}_2$  powder.

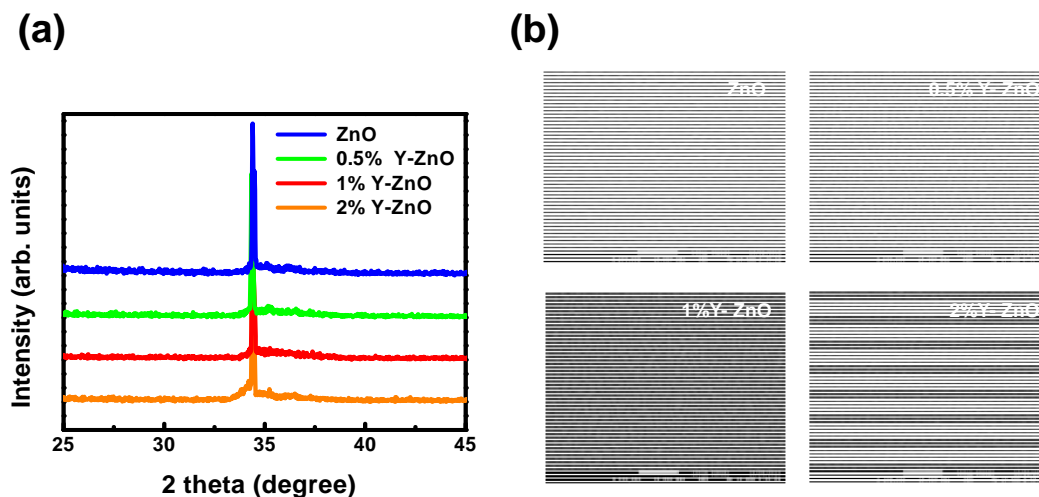

**Fig. S5.** (a) XRD patterns of ZnO and YZO films deposited on silicon substrate. Film thickness was  $\sim 150$  nm. (b) Representative SEM top-view images of ZnO and YZO films as a function of Y doping concentration. Scale bar = 100 nm.

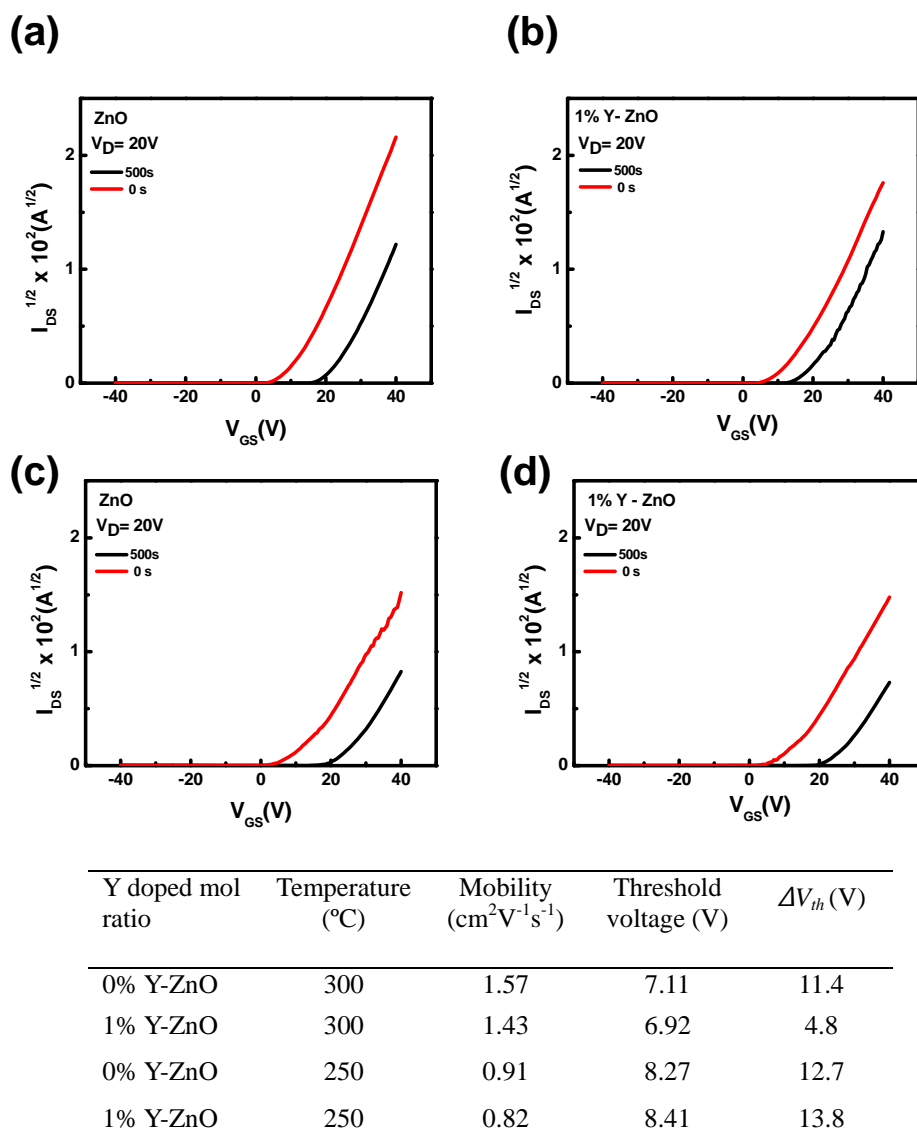

**Fig. S6.** The  $\sqrt{I_D}$  vs  $V_G$  plot to extract the threshold voltage shift for the spin-coated YZO-TFTs fabricated on  $\text{SiO}_2/\text{n}^+\text{-Si}$  substrates as a function of Y doped ratio. (a) and (b) samples were annealed at 300 °C. (c) and (d) samples were annealed at 250 °C. The bias instability was analyzed under a positive bias stress.
